# Supplementary material
Source: Springer Nature journal article supplement (https://www.springermedizin.de/resource/supplementary/12955_2012_1129_MOESM2_ESM.pdf/9559340)

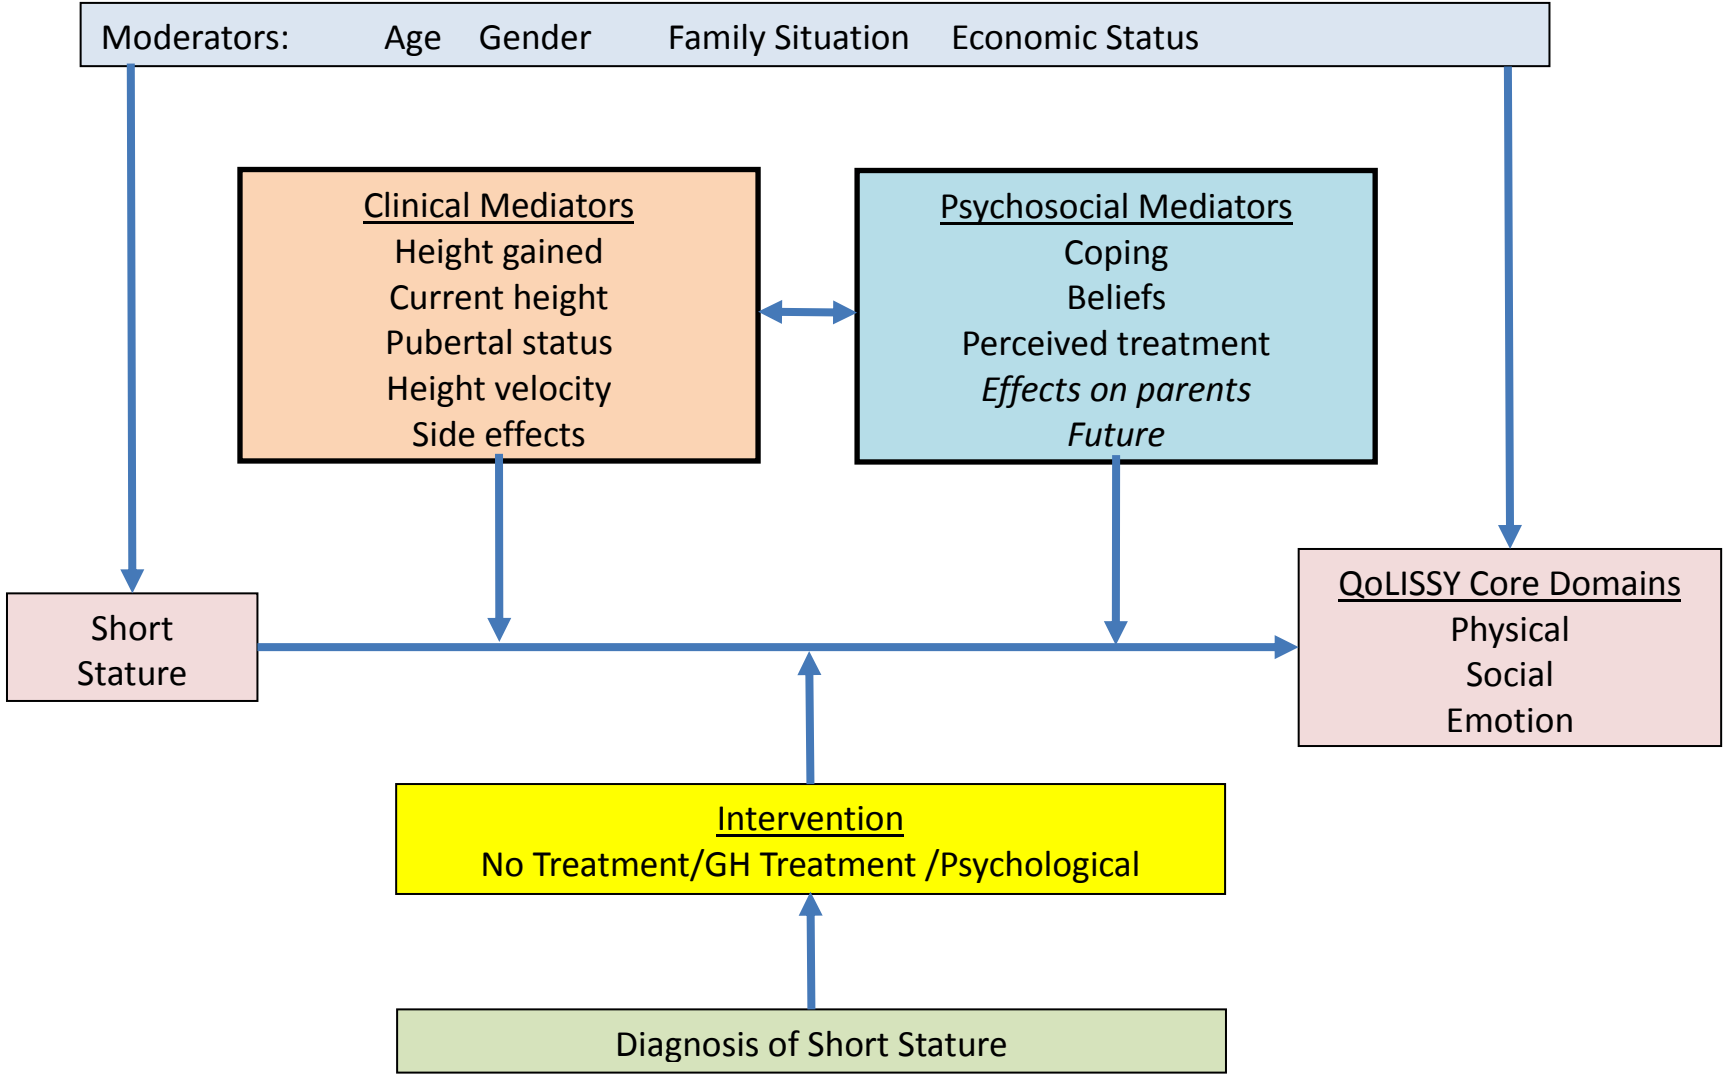

Supplement: MOESM2 [file 9559340]
